# Supplementary material for: Framing Future of Work Considerations through Climate and Built Environment Assessment of Volunteer Work Practices in the United States Equine Assisted Services
Source: MDPI journal article supplement (doi:10.3390/ijerph181910385), 2021-10-02
Supplement: s1 [file s1]

**Table S1.** Frequencies for space usage questions by climate designation.

| Space Usage Questions                                                                     | Cold/Very Cold | Mixed Humid | Hot Humid | Hot Dry/Mixed Dry |
|-------------------------------------------------------------------------------------------|----------------|-------------|-----------|-------------------|
| Which of the following best describes where you conduct the majority of your services?    | n = 13         | n = 12      | n = 4     | n = 4             |
| Covered arena                                                                             | 23%            | 25%         | 75%       | 50%               |
| Indoor/partially enclosed arena                                                           | 0%             | 0%          | 0%        | 50%               |
| Indoor/fully enclosed arena                                                               | 77%            | 58%         | 25%       | 0%                |
| Indoor/horse housing (stalls/barn)                                                        | 0%             | 17%         | 0%        | 0%                |
| (p = 0.0114, df = 9, $\chi^2 = 21.297$ )                                                  |                |             |           |                   |
| Select the activity for which you utilize your facility space the most.                   | n = 11         | n = 12      | n = 3     | n = 4             |
| Adaptive Riding/Therapeutic Riding                                                        | 82%            | 75%         | 34%       | 75%               |
| Hippotherapy                                                                              | 18%            | 25%         | 33%       | 0%                |
| Recreational Riding                                                                       | 0%             | 0%          | 0%        | 25%               |
| Competition/Boarding                                                                      | 0%             | 0%          | 33%       | 0%                |
| (p = 0.0813, df = 9, $\chi^2 = 15.366$ )                                                  |                |             |           |                   |
| What is the minimal volunteer to participant ratio for the indoor arena/activities space? | n = 10         | n = 10      | n = 3     | n = 3             |
| 1 volunteer to 1 participant                                                              | 70%            | 70%         | 67%       | 100%              |
| 2 volunteers to 1 participant                                                             | 20%            | 30%         | 33%       | 0%                |
| 3 volunteers to 1 participant                                                             | 10%            | 0%          | 0%        | 0%                |
| (p = 0.6823, df = 6, $\chi^2 = 3.958$ )                                                   |                |             |           |                   |
| How many horses or horse-volunteer-participant units are in the arena space at one time?  | n = 12         | n = 18      | n = 3     | n = 4             |
| Less than 2 on average                                                                    | 0%             | 50%         | 33%       | 75%               |
| Two to four on average                                                                    | 20%            | 50%         | 34%       | 25%               |
| More than four on average                                                                 | 80%            | 0%          | 33%       | 0%                |
| (p = 0.0775, df = 6, $\chi^2 = 11.373$ )                                                  |                |             |           |                   |

| Approximately how many volunteers participate in a typical day at this center?                                                | n = 12 | n = 11 | n = 3 | n = 4 |
|-------------------------------------------------------------------------------------------------------------------------------|--------|--------|-------|-------|
| Less than 10                                                                                                                  | 33%    | 27%    | 33%   | 50%   |
| 11-25                                                                                                                         | 25%    | 63%    | 33%   | 50%   |
| 26-45                                                                                                                         | 42%    | 10%    | 34%   | 0%    |
| (p = 0.3053, df = 6, X <sup>2</sup> = 7.171)                                                                                  |        |        |       |       |
| Annually, how many volunteers participate at this center?                                                                     | n = 11 | n = 11 | n = 3 | n = 4 |
| Less than 25                                                                                                                  | 0%     | 27%    | 0%    | 25%   |
| 26-50                                                                                                                         | 36%    | 0%     | 33%   | 0%    |
| 51-100                                                                                                                        | 9%     | 9%     | 33%   | 75%   |
| more than 100                                                                                                                 | 55%    | 64%    | 34%   | 0%    |
| (p = 0.0073, df = 9, X <sup>2</sup> = 22.552)                                                                                 |        |        |       |       |
| If applicable, how long is the volunteer in the indoor arena/activity area on a typical day at this center?                   | n = 11 | n = 10 | n = 3 | n = 3 |
| Low (< 2 hours daily)                                                                                                         | 45%    | 60%    | 67%   | 67%   |
| High (> 2 hours daily)                                                                                                        | 55%    | 40%    | 33%   | 33%   |
| (p = 0.8400, df = 3, X <sup>2</sup> = 0.839)                                                                                  |        |        |       |       |
| If applicable, how long is a typical volunteer in a barn/horse housing area on a typical day at this center?                  | n = 10 | n = 10 | n = 2 | n = 4 |
| Low (< 2 hours daily)                                                                                                         | 90%    | 50%    | 100%  | 75%   |
| High (> 2 hours daily)                                                                                                        | 10%    | 50%    | 0%    | 25%   |
| (p = 0.1431, df = 3, X <sup>2</sup> = 5.426)                                                                                  |        |        |       |       |
| If applicable, how many hours per week does each volunteer engage in activities offered in the indoor arena/activities space? | n = 10 | n = 10 | n = 3 | n = 3 |
| Low (< 2 hours weekly)                                                                                                        | 20%    | 10%    | 33%   | 67%   |
| High (> 2 hours weekly)                                                                                                       | 80%    | 90%    | 67%   | 33%   |
| (p = 0.2677, df = 3, X <sup>2</sup> = 3.943)                                                                                  |        |        |       |       |

| If applicable, how many hours per week does each volunteer engage in activities offered in the barn/horse housing area? | n = 10 | n = 10 | n = 3 | n = 4 |
|-------------------------------------------------------------------------------------------------------------------------|--------|--------|-------|-------|
| Low (< 2 hours weekly)                                                                                                  | 80%    | 30%    | 100%  | 75%   |
| High (> 2 hours weekly)                                                                                                 | 20%    | 70%    | 0%    | 25%   |
| (p = 0.0311, df = 3, $\chi^2 = 28.870$ )                                                                                |        |        |       |       |

**Table S2.** Frequencies for safety topic questions by climate designation.

| Safety Questions                                                                         | Cold/Very Cold | Mixed Humid | Hot Humid | Hot Dry/Mixed Dry |
|------------------------------------------------------------------------------------------|----------------|-------------|-----------|-------------------|
| Do you have any concerns about the environment within the indoor arena/activities space? | n = 12         | n = 10      | n = 4     | n = 4             |
| Yes                                                                                      | 58%            | 80%         | 100%      | 75%               |
| No                                                                                       | 42%            | 20%         | 0%        | 25%               |
| (p = 0.2628, df = 3, X <sup>2</sup> = 3.988)                                             |                |             |           |                   |
| Do your concerns fall into any of these categories?                                      | n = 7          | n = 8       | n = 4     | n = 3             |
| Multiple (air movement, moisture, dust, temperature)                                     | 14%            | 62.5%       | 50%       | 67%               |
| Temperature                                                                              | 43%            | 25%         | 0%        | 33%               |
| Dust                                                                                     | 43%            | 12.5%       | 50%       | 0%                |
| (p = 0.1667, df = 6, X <sup>2</sup> = 9.124)                                             |                |             |           |                   |
| What is the main component of the surface footing in the indoor arena/activity area?     | n = 12         | n = 10      | n = 4     | n = 4             |
| Dirt/Clay                                                                                | 17%            | 0%          | 0%        | 0%                |
| Sand/washed sand                                                                         | 42%            | 80%         | 50%       | 75%               |
| Mixed (Wood Chip/Sawdust Textile/fiber)                                                  | 42%            | 10%         | 25%       | 25%               |
| Rubber                                                                                   | 0%             | 10%         | 0%        | 0%                |
| (p = 0.2806, df = 9, X <sup>2</sup> = 10.929)                                            |                |             |           |                   |
| What other materials are in the footing mixture?                                         | n = 8          | n = 8       | n = 3     | n = 3             |
| Dirt/Clay                                                                                | 25%            | 0%          | 33%       | 33%               |
| Sand/washed sand                                                                         | 0%             | 0%          | 0%        | 33%               |
| Crushed Rock/Wood Chip                                                                   | 12.5%          | 25%         | 0%        | 0%                |
| Textile/fiber                                                                            | 12.5%          | 12.5%       | 0%        | 0%                |
| Rubber                                                                                   | 0%             | 12.5%       | 67%       | 0%                |
| Waxed Sand                                                                               | 25%            | 0%          | 0%        | 0%                |
| Dust suppression additive (Magnesium Chloride)                                           | 0%             | 50%         | 0%        | 34%               |
| (p = 0.5423, df = 39, X <sup>2</sup> = 37.413)                                           |                |             |           |                   |
| Who is responsible for maintaining the arena space?                                      | n = 12         | n = 10      | n = 3     | n = 4             |

|                                                           |     |     |      |      |
|-----------------------------------------------------------|-----|-----|------|------|
| Volunteers                                                | 17% | 10% | 0%   | 0%   |
| Staff                                                     | 67% | 90% | 100% | 100% |
| Other (contracted labor; property owners/leased property) | 16% | 0%  | 0%   | 0%   |
| (p = 0.4155, df = 6, X <sup>2</sup> = 6.069)              |     |     |      |      |

---

**Table S3.** Frequencies for organization topic questions by climate designation.

| Organization Questions                                                                                                                              | Cold/Very Cold | Mixed Humid | Hot Humid | Hot Dry/Mixed Dry |
|-----------------------------------------------------------------------------------------------------------------------------------------------------|----------------|-------------|-----------|-------------------|
| Which of the following describes your Member Center affiliation?                                                                                    | n = 12         | n = 9       | n = 4     | n = 4             |
| PATH International/Premier Center Member                                                                                                            | 17%            | 67%         | 25%       | 50%               |
| United States Equestrian Federation                                                                                                                 | 0%             | 0%          | 25%       | 0%                |
| American Hippotherapy Association                                                                                                                   | 0%             | 11%         | 25%       | 0%                |
| National Council for Therapeutic Recreation Certification                                                                                           | 8%             | 0%          | 0%        | 0%                |
| Multiple Affiliations (including PATH)                                                                                                              | 75%            | 22%         | 25%       | 50%               |
| (p = 0.2245, df = 24, X <sup>2</sup> = 28.886)                                                                                                      |                |             |           |                   |
| Which of the following best describes the majority of your participants who engage in your equine assisted activities or equine assisted therapies? | n = 13         | n = 12      | n = 4     | n = 4             |
| Children under 9 years                                                                                                                              | 23%            | 0%          | 0%        | 25%               |
| Children under 18 years                                                                                                                             | 70%            | 83%         | 75%       | 50%               |
| Adults above 18 years                                                                                                                               | 8%             | 17%         | 25%       | 25%               |
| (p = 0.2210, df = 9, X <sup>2</sup> = 11.865)                                                                                                       |                |             |           |                   |
| Are you aware if the center volunteers have any of the following respiratory conditions?                                                            | n = 11         | n = 9       | n = 3     | n = 4             |
| Seasonal allergy (pollen primarily)                                                                                                                 | 10%            | 55%         | 33%       | 0%                |
| Horse allergy (dander primarily)                                                                                                                    | 27%            | 11%         | 33%       | 25%               |
| Grass/hay allergy                                                                                                                                   | 18%            | 0%          | 0%        | 0%                |
| I am not aware of any health conditions of volunteers                                                                                               | 45%            | 35%         | 33%       | 75%               |
| (p = 0.2386, df = 9, X <sup>2</sup> = 11.572)                                                                                                       |                |             |           |                   |
| Do volunteers receive training/education about the following respiratory conditions?                                                                | n = 10         | n = 9       | n = 2     | n = 4             |
| Severe conditions (e.g., use of artificial respirators)                                                                                             | 0%             | 12%         | 0%        | 0%                |
| Mild conditions (e.g. Seasonal, horse, grass/hay allergy)                                                                                           | 60%            | 55%         | 50%       | 0%                |
| Multiple conditions (Severe and allergy)                                                                                                            | 10%            | 22%         | 0%        | 50%               |
| I am not aware of any volunteer training/education in respiratory conditions                                                                        | 30%            | 11%         | 50%       | 50%               |
| (p = 0.3518, df = 12, X <sup>2</sup> = 13.241)                                                                                                      |                |             |           |                   |

|                                                                                                                                                                                     |        |       |       |       |
|-------------------------------------------------------------------------------------------------------------------------------------------------------------------------------------|--------|-------|-------|-------|
| Are you aware if the center horses involved in activities have any of the following respiratory conditions?                                                                         | n = 11 | n = 9 | n = 3 | n = 4 |
| ROA (recurrent airway obstruction)                                                                                                                                                  | 9%     | 0%    | 0%    | 0%    |
| IAD (non-infectious inflammatory airway disease)                                                                                                                                    | 9%     | 0%    | 0%    | 0%    |
| Seasonal allergy                                                                                                                                                                    | 18%    | 22%   | 0%    | 0%    |
| No diagnosed condition, but horses will cough                                                                                                                                       | 9%     | 22%   | 67%   | 25%   |
| I am not aware of any health conditions of horses                                                                                                                                   | 55%    | 56%   | 33%   | 75%   |
| (p = 0.4529, df = 15, X <sup>2</sup> = 14.979)                                                                                                                                      |        |       |       |       |
| If horses do not have diagnosed conditions, but will cough, then which of the following do you observe to cause the most coughing in the horses?                                    | n = 2  | n = 2 | n = 2 | n = 1 |
| When in the stall/barn area                                                                                                                                                         | 50%    | 0%    | 0%    | 0%    |
| During activities in the arena                                                                                                                                                      | 50%    | 100%  | 100%  | 100%  |
| (p = 0.3964, df = 3, X <sup>2</sup> = 2.969)                                                                                                                                        |        |       |       |       |
| If horse coughing is observed in the stall/barn or during activities/interventions in the arena space, which time of year do you notice the majority of the coughing in the horses? | n = 2  | n = 2 | n = 2 | n = 1 |
| Winter                                                                                                                                                                              | 0%     | 50%   | 0%    | 0%    |
| Spring                                                                                                                                                                              | 100%   | 0%    | 50%   | 0%    |
| Summer                                                                                                                                                                              | 0%     | 0%    | 50%   | 0%    |
| Fall                                                                                                                                                                                | 0%     | 0%    | 0%    | 0%    |
| Year round                                                                                                                                                                          | 0%     | 50%   | 0%    | 100%  |
| (p = 0.1952, df = 9, X <sup>2</sup> = 12.333)                                                                                                                                       |        |       |       |       |

**Table S4.** Frequencies for environmental control topic questions by climate designation.

| Environmental Control Questions                                        | Cold/Very Cold | Mixed Humid | Hot Humid | Hot Dry/Mixed Dry |
|------------------------------------------------------------------------|----------------|-------------|-----------|-------------------|
| Are there temperature/ventilation control methods in the indoor arena? | n = 11         | n = 10      | n = 4     | n = 4             |
| Fans                                                                   | 28%            | 30%         | 50%       | 75%               |
| Heaters                                                                | 27%            | 40%         | 25%       | 0%                |
| None                                                                   | 45%            | 30%         | 25%       | 25%               |
| (p = 0.5239, df = 6, X <sup>2</sup> = 2.588)                           |                |             |           |                   |
| What type of fans are used?                                            | n = 6          | n = 6       | n = 2     | n = 3             |
| Box fan                                                                | 33%            | 17%         | 0%        | 67%               |
| Low speed, high velocity (ceiling mounted)                             | 50%            | 33%         | 100%      | 33%               |
| Exhaust                                                                | 17%            | 50%         | 0%        | 0%                |
| (p = 0.2546, df = 6, X <sup>2</sup> = 3.890)                           |                |             |           |                   |
| How many fans?                                                         | n = 5          | n = 6       | n = 2     | n = 3             |
| One to three                                                           | 60%            | 100%        | 100%      | 100%              |
| Four to six                                                            | 20%            | 0%          | 0%        | 0%                |
| Six to nine                                                            | 20%            | 0%          | 0%        | 0%                |
| (p = 0.5483, df = 6, X <sup>2</sup> = 4.965)                           |                |             |           |                   |
| When are fans used for ventilation?                                    | n = 6          | n = 6       | n = 2     | n = 3             |
| Year-round                                                             | 0%             | 33%         | 0%        | 0%                |
| When horses and humans are hot                                         | 33%            | 33%         | 50%       | 67%               |
| Based on thermometer (set heat limits)                                 | 0%             | 17%         | 0%        | 0%                |
| When it feels humid in the facility                                    | 17%            | 0%          | 0%        | 0%                |
| During fly season                                                      | 17%            | 0%          | 0%        | 0%                |
| Multiple (temperature, dust, flies)                                    | 33%            | 17%         | 50%       | 33%               |
| (p = 0.4037, df = 24, X <sup>2</sup> = 25.038)                         |                |             |           |                   |
