# Supplementary material for: Framing Future of Work Considerations through Climate and Built Environment Assessment of Volunteer Work Practices in the United States Equine Assisted Services
Source: MDPI journal article supplement (doi:10.3390/ijerph181910385), 2021-10-02

**Figure S1.** Example of a volunteer-horse-unit a fully enclosed arena (used with permission from Healing Strides of VA, Boone's Mill, VA).

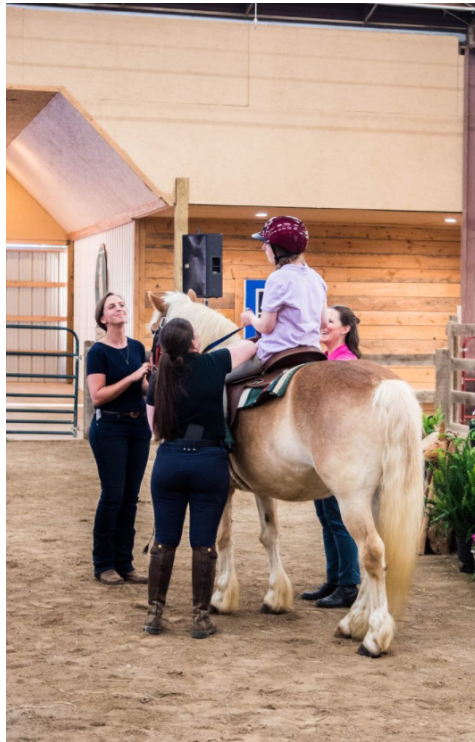

Supplement: s1 [file s1]
